# Supplementary material for: Discovery of a Siderophore Export System Essential for Virulence of Mycobacterium tuberculosis
Source: PLoS Pathog. 2013 Jan 31;9(1):e1003120. doi: 10.1371/journal.ppat.1003120 (PMC3561183; doi:10.1371/journal.ppat.1003120)
Supplement: Table S2 — Oligonucleotides used in this work. Restriction sites used for cloning are underlined. aSpeI, bPacI, cBfrBI, dHindIII, eNdeI (DOCX) [file ppat.1003120.s021.docx]

| **Oligonucleotide** | **Sequence (5’→3’)** |
| --- | --- |
| a1409 | GCACTAGTGACCGCCACCACCACGACAG |
| 1410 | GTATCCAGGCACGCTTGAGAG |
| b1411 | GCTTAATTAACCTGACCTACTGCTTTGTG |
| c1412 | CATAGAATGCATCGATCAGGAAGATGGCGTAGTC |
| a1568 | CGACTAGTCACCGCAGCCAGCAATGCCCCGAGTTC |
| 1569 | GCATTAGCACCTTGAAAATCTCAG |
| b1570 | CGTTAATTAAAGTCAACGCCTATACTTACTGCTTG |
| c1571 | GCATGCATGGTCAATCCAGAGCCCAGAATCACG |
| b1767 | CGTTAATTAACCGGACCTTCGCCTTGGTCTGAGCCGTAC |
| c1768 | GCATGCATCGATTTGTGGTGGCTGCGGCG |
| b1773 | GCTTAATTAAGAGCAGCGACCGCCTCGGCTG |
| c1774 | GCATGCATTAGCCTGCTGATGTCGTAGC |
| d1811 | GCAAGCTTCGAATTTAGTACTCACGC |
| a1812 | GCACTAGTGATCGGCGGCCAGACCGTTG |
| d1813 | GCAAGCTTCGATCATGCGGATTTCACAAAGC |
| a1814 | GCACTAGTGATCCCGCATCTCCCGCAGCC |
| 1953 | CGGAGCACTAGTGCTGTTATGTCGGTGCCT |
| 1954 | CGGACATTTAAATGGGCAGCTGTTTGGGGGC |
| 1984 | GATGCCTGGCAGTTTATG |
| e2356 | GCCATATGCACCACCACCACCACCATCGTATCCGCGGCTTCTTTGGTAGC |
| e2357 | GCCATATGCACCACCACCACCACCACCGTATCCGCACGTTTTTCGGCAGCGAAG |

**Table S2. Oligonucleotides used in this work.** Restriction sites used for cloning are underlined.

aSpeI, bPacI, cBfrBI, dHindIII, eNdeI
